# Supplementary figures and images for: Dose-Response Study on Surfactant Nebulization Therapy During Nasal Continuous Positive Airway Pressure Ventilation in Spontaneously Breathing Surfactant-Deficient Newborn Piglets*
Source: PubMed Central journal article supplement — Pediatr Crit Care Med. 2020 Mar 17;21(7):e456–66. doi: 10.1097/PCC.0000000000002313 (PMC7326365; doi:10.1097/pcc.0000000000002313), 2020-03-17

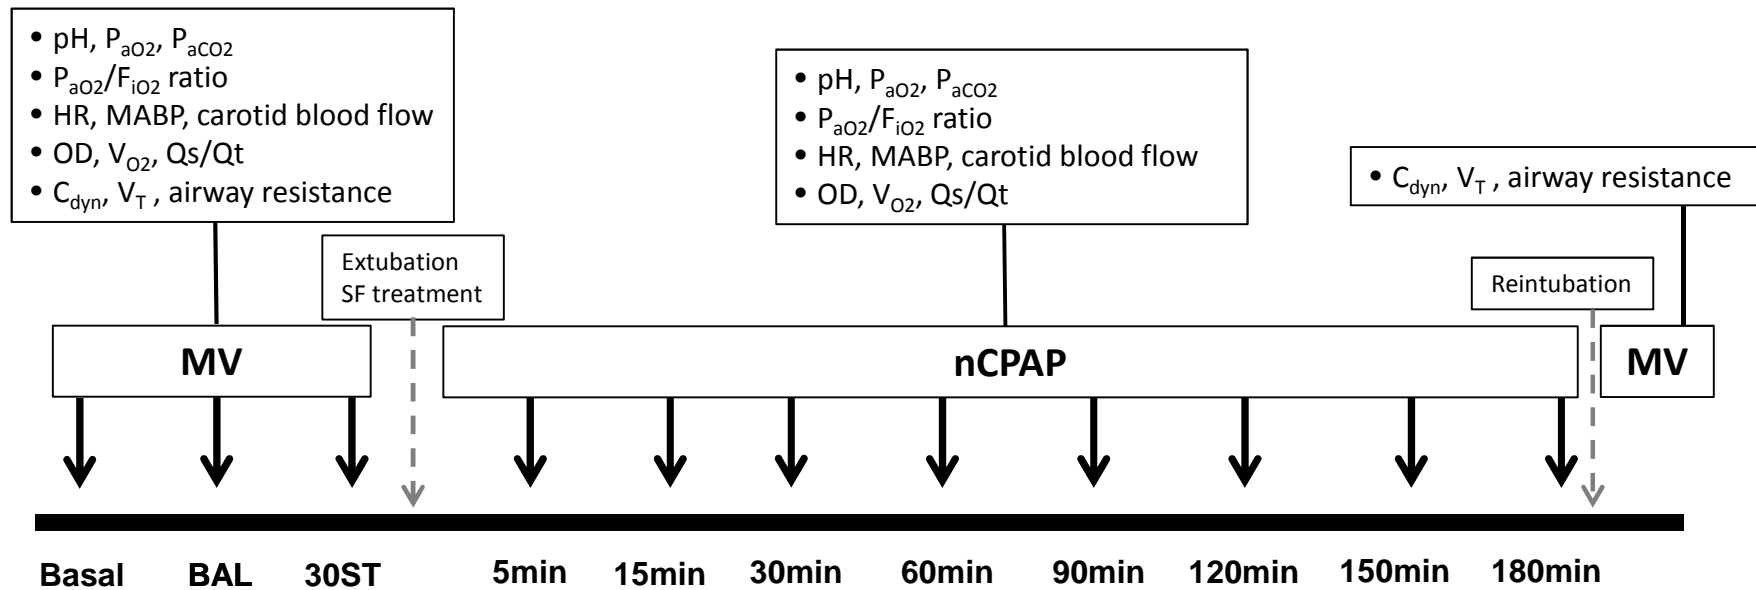

Supplement: pcc-21-e456-s001.pdf [file pcc-21-e456-s001.pdf]
